# Supplementary material for: Stochastic Modelling of Reservoir Sedimentation in a Semi-Arid Watershed
Source: Springer Nature journal article supplement (doi:10.1007/s11269-014-0843-4), 2014-11-09

## Digital model of the pre-impoundment topography (Courtesy of Marc Binard - ULg)

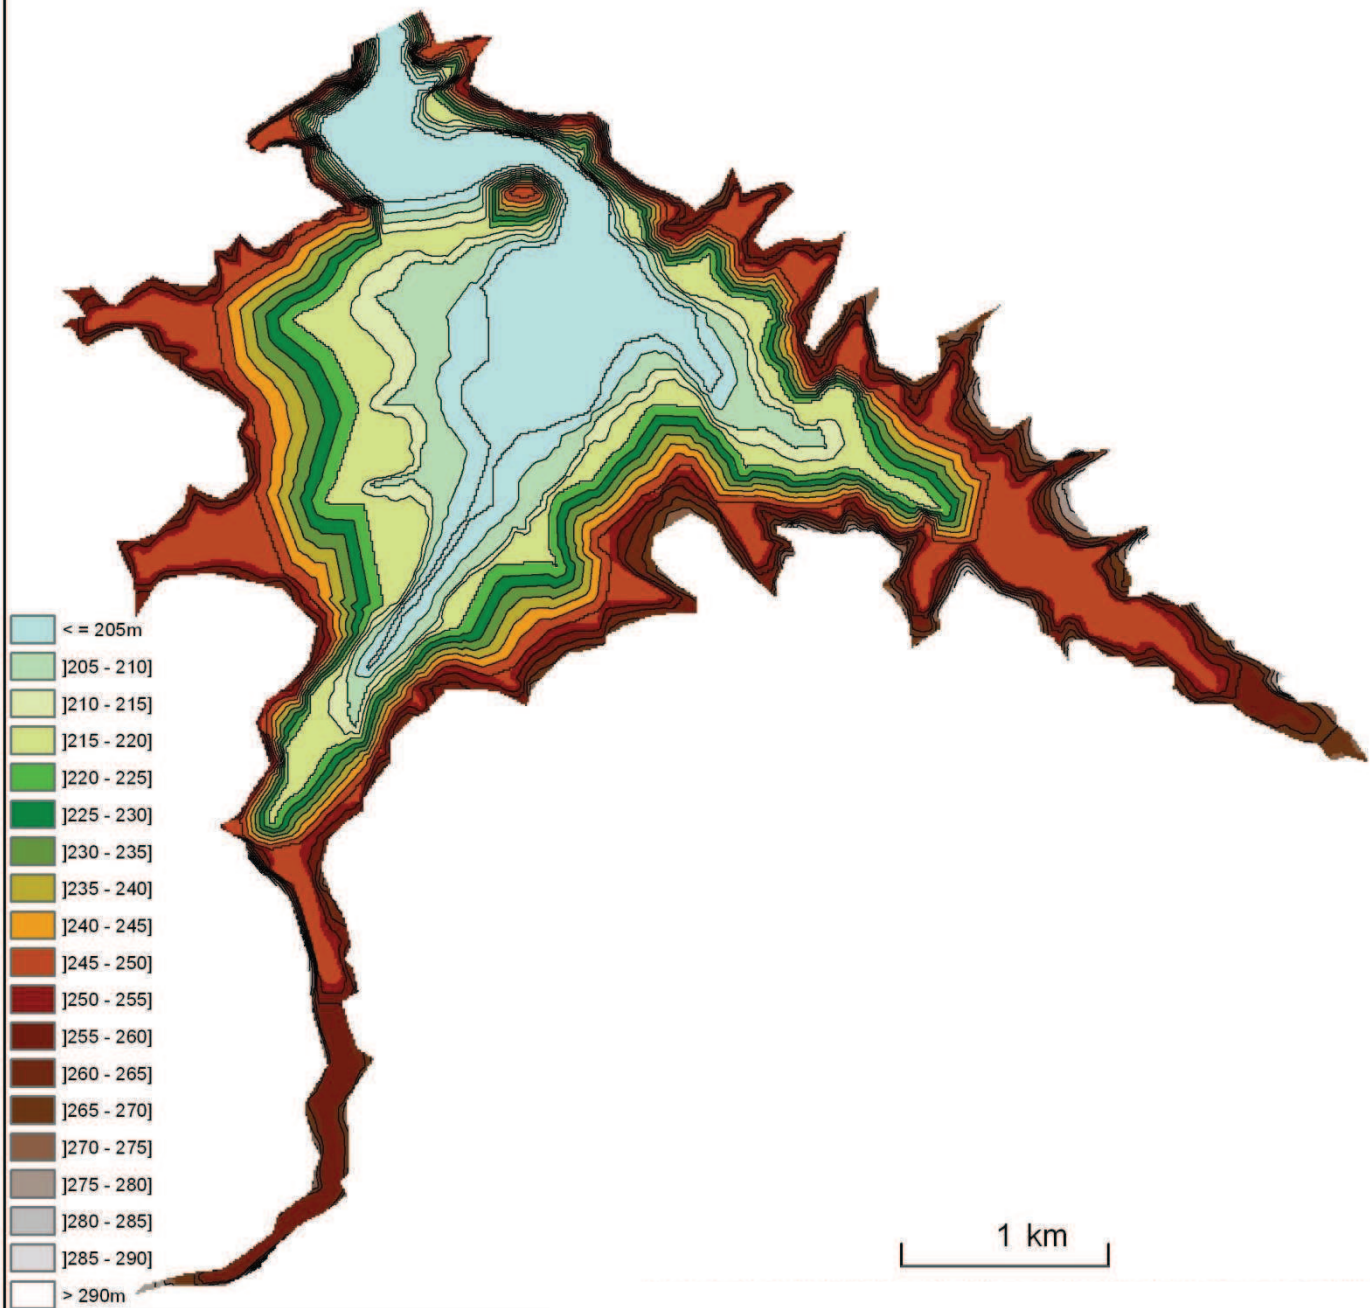

# Digital modes of the reservoir bathymetry as surveyed in 2004

(Courtesy of Marc Binard - ULg)

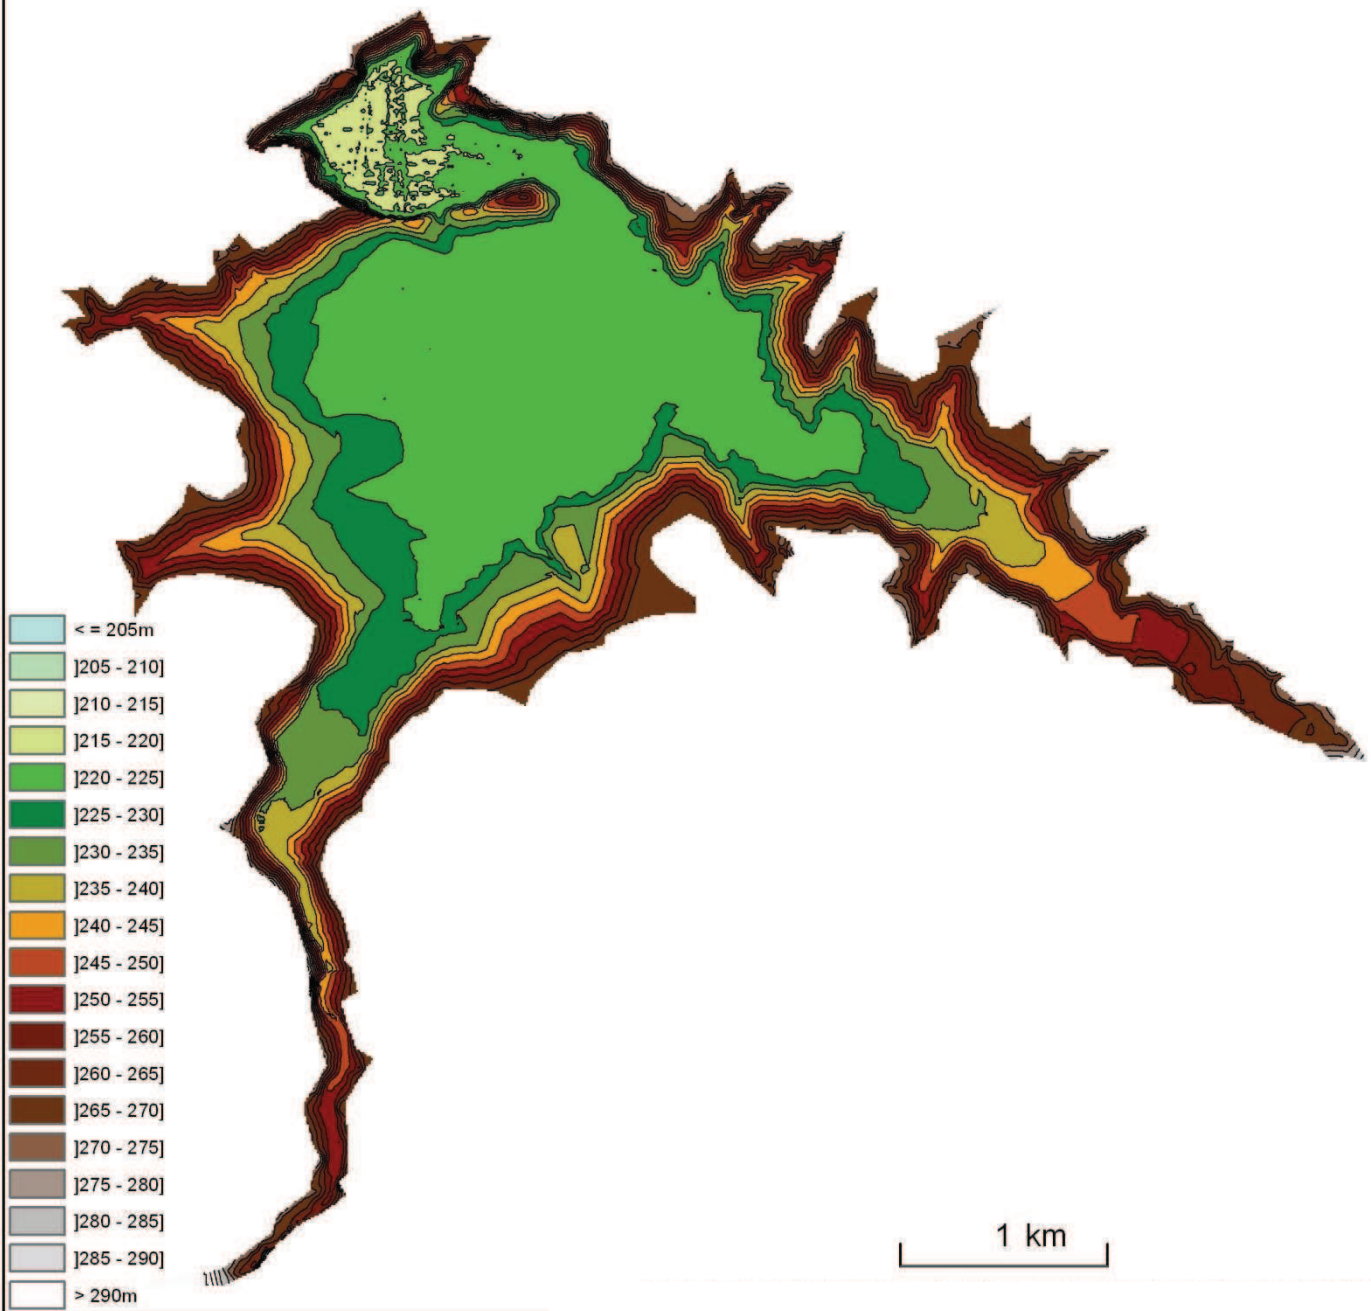

Difference between the pre-impoundment topography  
and the bathymetry surveyed in 2004  
(Courtesy to Marc Binard - ULg)

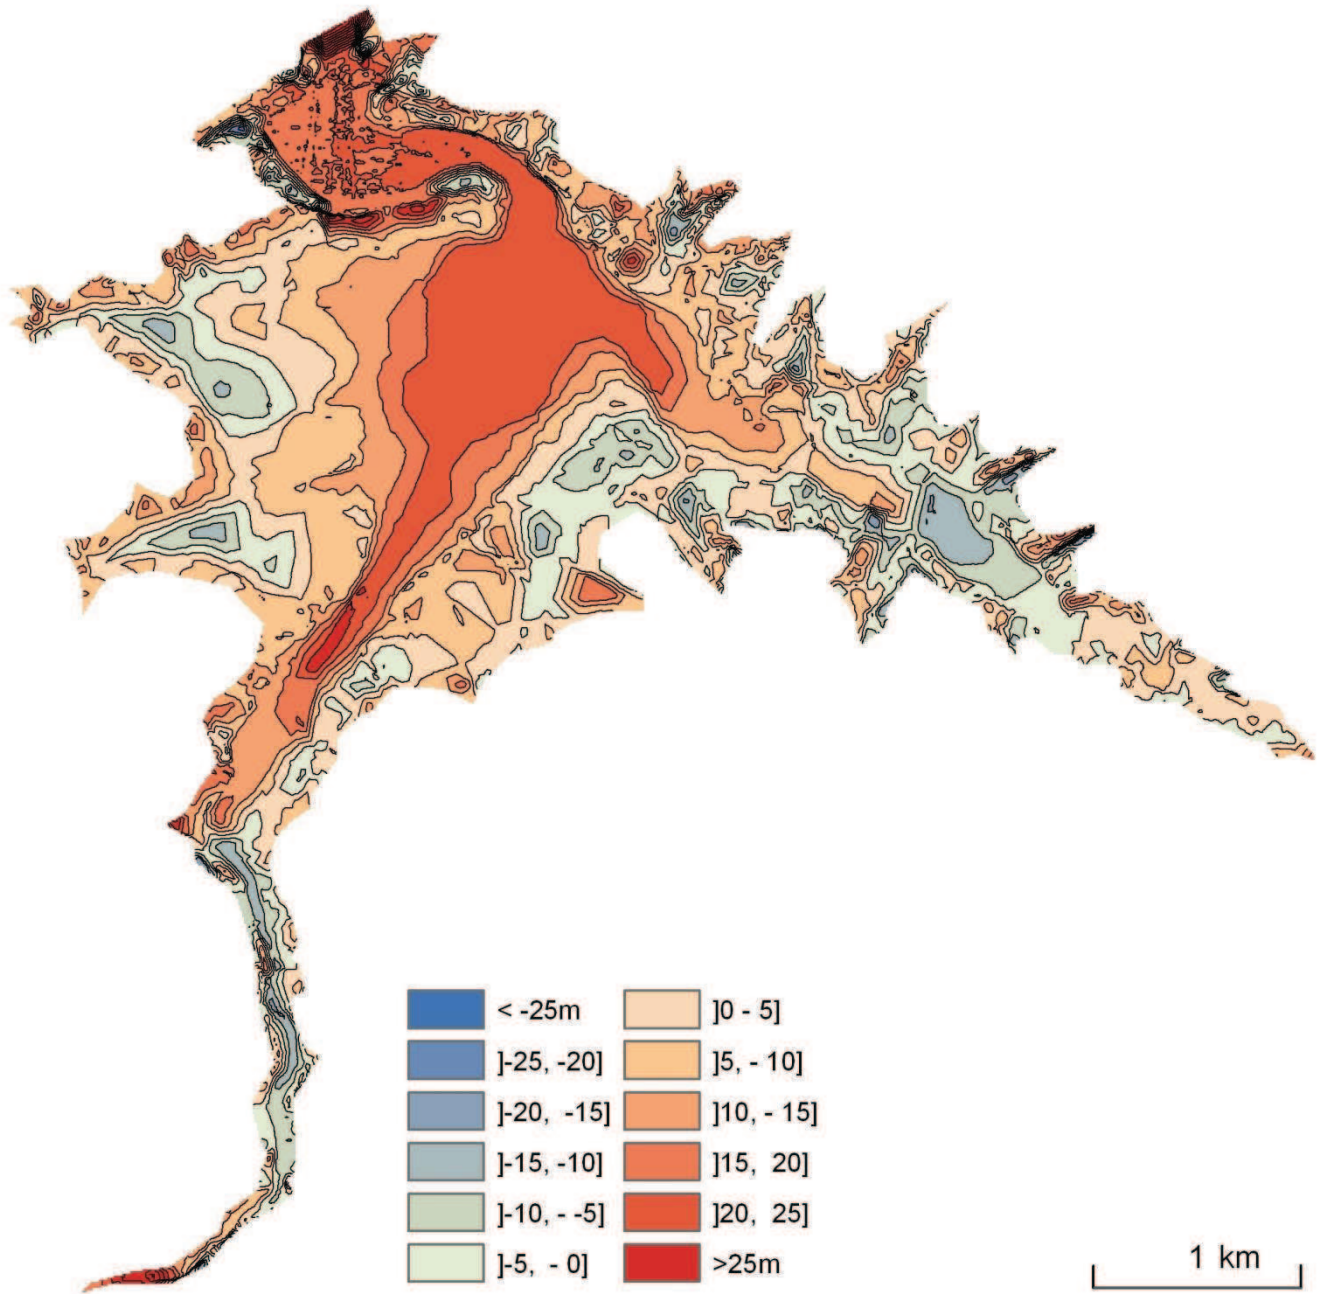

Supplement: MOESM1 [file 11269_2014_843_MOESM1_ESM.pdf]
