# Supplementary material for: Stochastic Modelling of Reservoir Sedimentation in a Semi-Arid Watershed
Source: Springer Nature journal article supplement (doi:10.1007/s11269-014-0843-4), 2014-11-09
Supplement: MOESM1 [file 11269_2014_843_MOESM1_ESM.pdf]

ORBi: Request Item


- Login
- EN

  [EN] English

  [FR] Français

- - Login
  - EN

    [EN] English

    [FR] Français
- Give us feedback
- Explore

  SearchSpecial collections
- Statistics
- News
- Help

  Start on ORBiDepositProfilePublication ListAdd your ORCIDTutorialsLegal InformationTraining sessions
- About

  What's ORBi ?Impact and visibilityAround ORBiAbout statisticsAbout metricsOAI-PMHORBi teamRelease Notes

Back

1. Home
2. Request Item

If you're **member of the institution**,  you just have to login to download the file in restricted access. It is not necessary to request a print.

# Request copy

Stochastic modelling of reservoir sedimentation in a semi-arid watershed

Adam, Nicolas; Erpicum, Sébastien; Archambeau, Pierre *et al.*

2015 • In *Water Resources Management, 29* (3), p. 785-800

  

Document(s) requested

11269\_2014\_843\_MOESM1\_ESM.pdf

  

The desired document is not currently available on open access. Nevertheless you can request an offprint through the form below. If your request is accepted you will receive by e-mail a link allowing you access to the document for 5 days, 5 download attempts maximum.

  

##### Request form

Fields marked with ✱ are compulsory.

Your last name

Your last name

Your first name

Your e-mail

Your affiliation

Document(s) requested

11269\_2014\_843\_MOESM1\_ESM.pdf

Adam\_2015.pdf

Adam\_2014.pdf

11269\_2014\_843\_MOESM2\_ESM.pdf

11269\_2014\_843\_MOESM3\_ESM.pdf

Reason of the demand

Back to the reference
Send the request

### The request item has been sent.

### The system has experienced an internal error. Please try to do what you were doing again, and if the problem persists, please contact us so we can fix the problem.

### Actions or data sent do not correspond to human behavior. Please try again.

### Your request item can not succeed. No author can be contacted to handle your request.

OK


Contact ORBi

University of Liège  
Place du 20-Août, 7  
B- 4000 Liège  
+32 4 366 21 11

ULiège Library

What's Open Access ?Open Access @ ULiègePublish in Open Access

ORBi (issn 2736-772X)

ReferencingProject BackgroundORBi 10 yearsAround ORBi

Quick links

ULiège MandateTutorialsORCIDOAI-PMH Output

Terms of use -Privacy Policy -
ORBi is a project developed by University of Liege
