# Supplementary material for: Stochastic Modelling of Reservoir Sedimentation in a Semi-Arid Watershed
Source: Springer Nature journal article supplement (doi:10.1007/s11269-014-0843-4), 2014-11-09
Supplement: MOESM3 [file 11269_2014_843_MOESM3_ESM.pdf]

### Statistical distributions of inflow characteristics (zero values and flood values excluded): annual mean

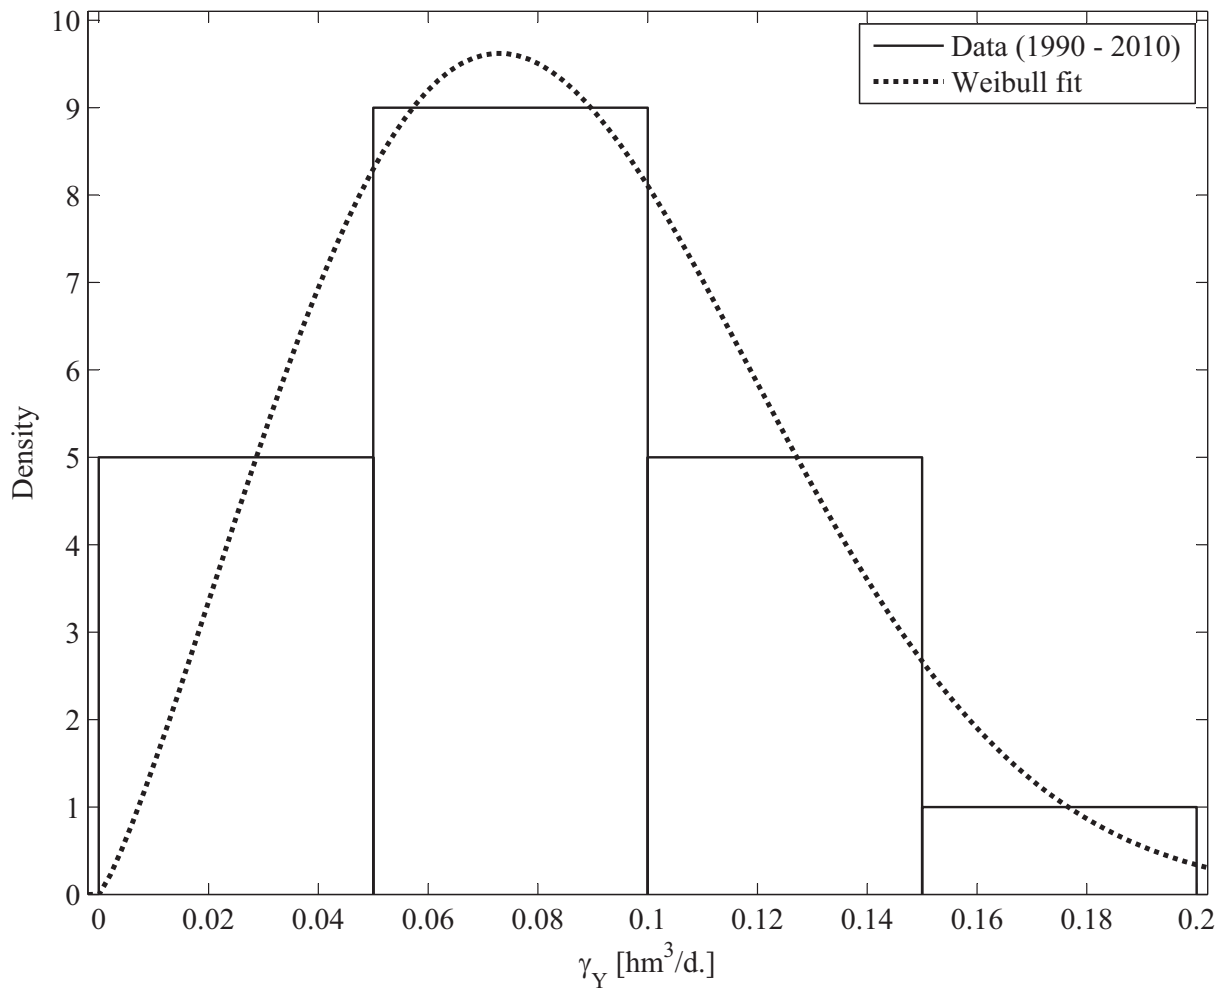

Statistical distributions of inflow characteristics  
(zero values and flood values excluded):  
relative seasonal deviation during the wet season

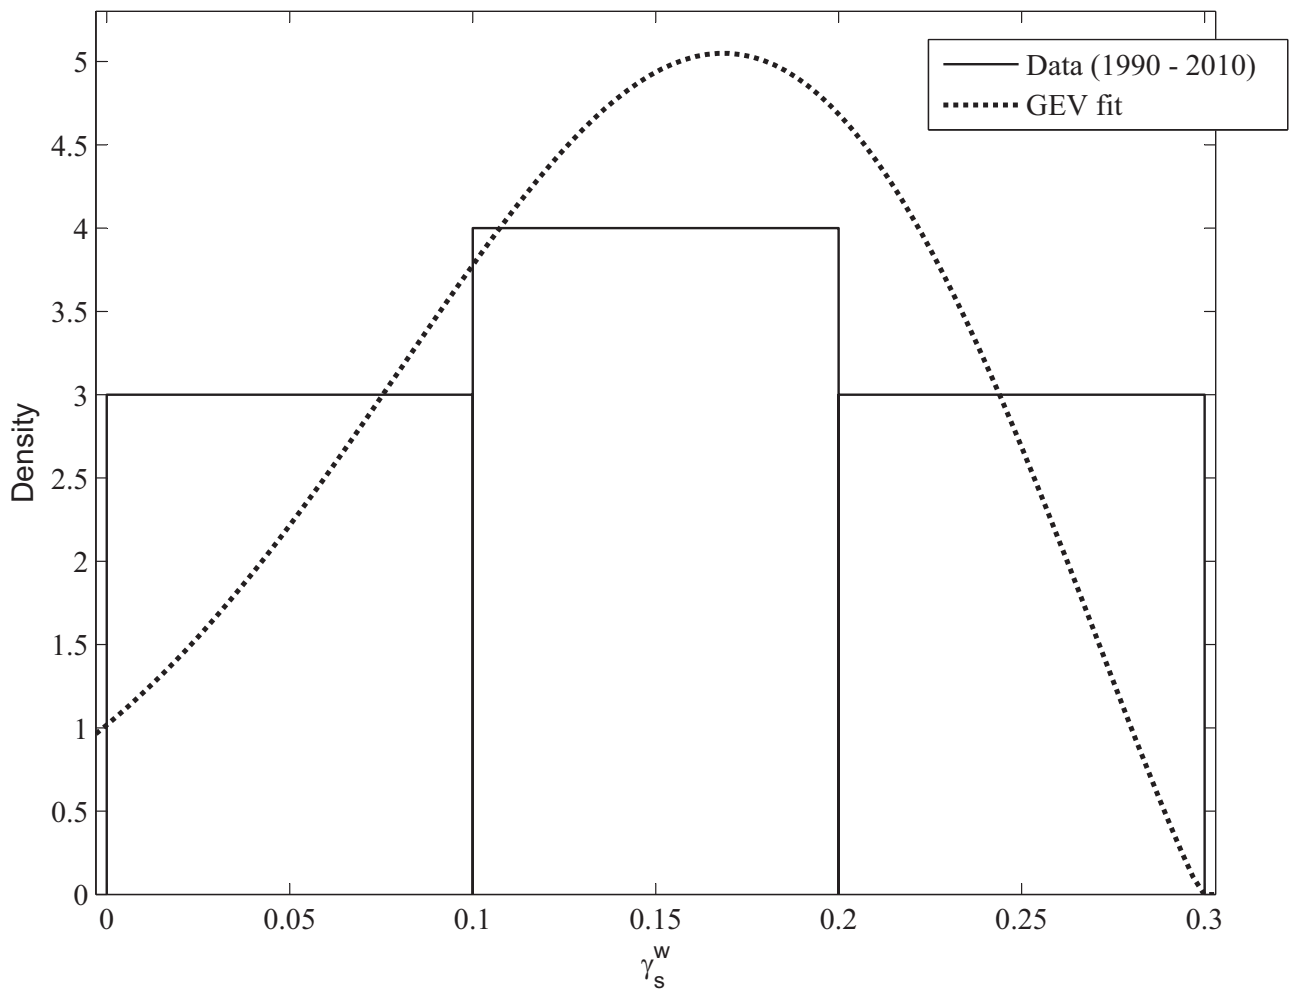

Statistical distributions of inflow characteristics  
(zero values and flood values excluded):  
relative daily deviation during the wet season

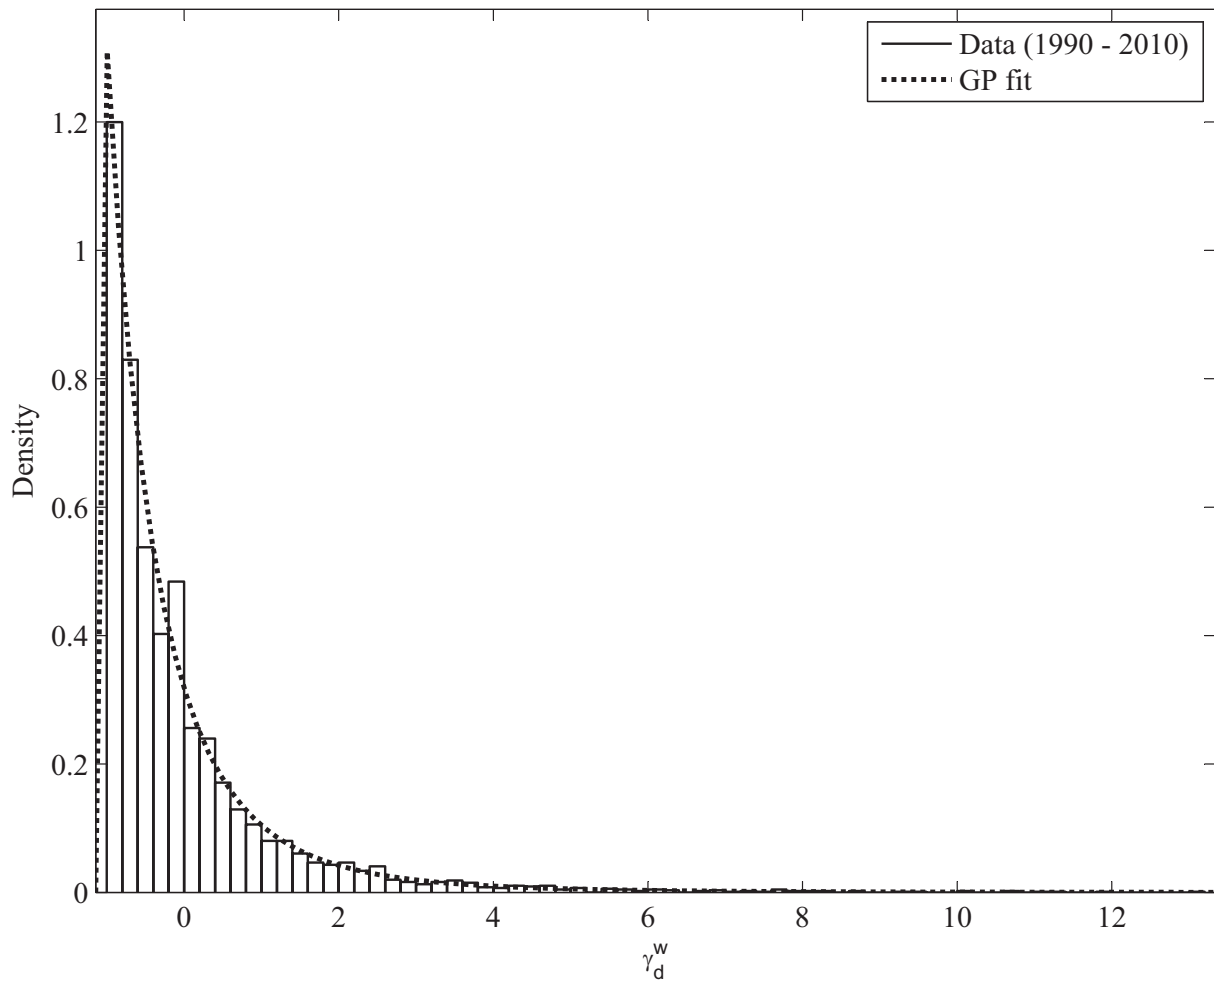

Statistical distributions of inflow characteristics  
(zero values and flood values excluded):  
relative daily deviation during the dry season

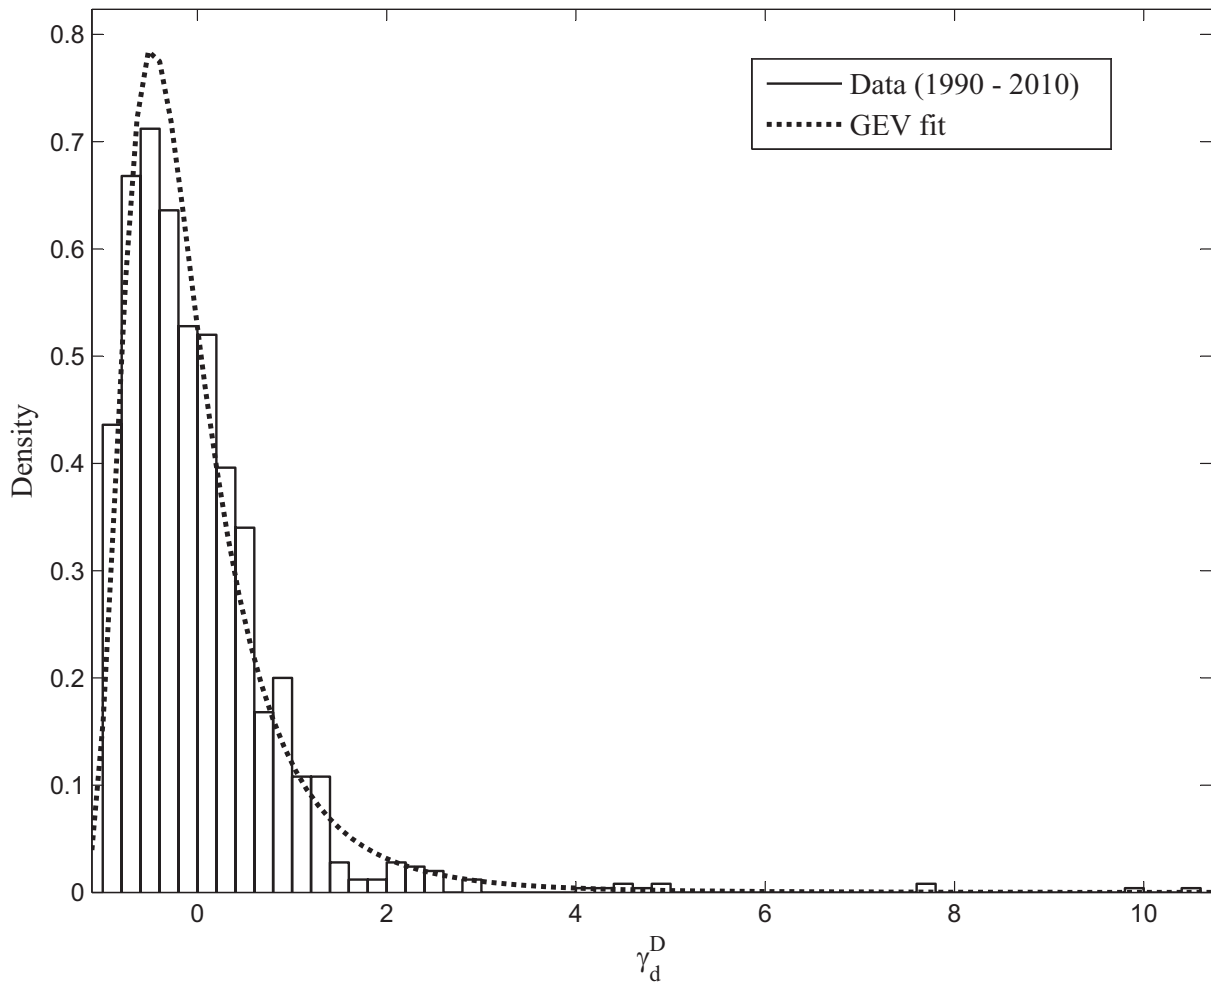

## Statistical distributions of inflow characteristics (zero values and flood values excluded)

**Table 1: Parameters of statistical distributions.**

| Variable                                                                                | Distribution              | Parameters                                          |
|-----------------------------------------------------------------------------------------|---------------------------|-----------------------------------------------------|
| Annual mean inflow: $\gamma_Y = \langle Q \rangle_Y$                                    | Weibull                   | $a = 0.0957$<br>$b = 2.2150$<br>$k = -0.4711$       |
| Wet seasonal variation: $\gamma_s^w = \frac{\Delta Q_s^w}{\langle Q \rangle_Y}$         | Generalized Extreme Value | $\sigma = 0.0833$<br>$\mu = 0.1226$<br>$k = 0.2443$ |
| Daily variation (wet season): $\gamma_d^w = \frac{\Delta Q_d^w}{\langle Q \rangle_s^w}$ | Generalized Pareto        | $\sigma = 0.7581$<br>$\theta = -1$<br>$k = 0.2035$  |
| Daily variation (dry season): $\gamma_d^D = \frac{\Delta Q_d^D}{\langle Q \rangle_s^D}$ | Generalized Extreme Value | $\sigma = 0.4761$<br>$\mu = -0.3925$                |

**Table 2: Comparison of statistical parameters from data and from fitted distributions.**

|                       | Mean   |        | Variance |        | Skewness |         | Kurtosis |         |
|-----------------------|--------|--------|----------|--------|----------|---------|----------|---------|
|                       | Data   | Fit    | Data     | Fit    | Data     | Fit     | Data     | Fit     |
| $\langle Q \rangle_Y$ | 0.0844 | 0.0845 | 0.0018   | 0.0016 | 0.5150   | 0.5168  | 2.1425   | 3.1099  |
| $\Delta Q_s^w$        | 0.1428 | 0.1430 | 0.0064   | 0.0060 | -0.1420  | -0.5625 | 2.1252   | 3.1449  |
| $\Delta Q_d^w$        | 0      | 0.0030 | 1.7454   | 1.9678 | 3.4757   | 5.3616  | 20.7939  | 58.7064 |
| $\Delta Q_d^D$        | 0      | 0.0004 | 0.8283   | 0.7708 | 4.3582   | 3.2400  | 39.2239  | 26.5785 |

Cumulative distribution function (CDF) used  
for the evaluation of flood inflows:  
Flood events during the 1990-2010 period

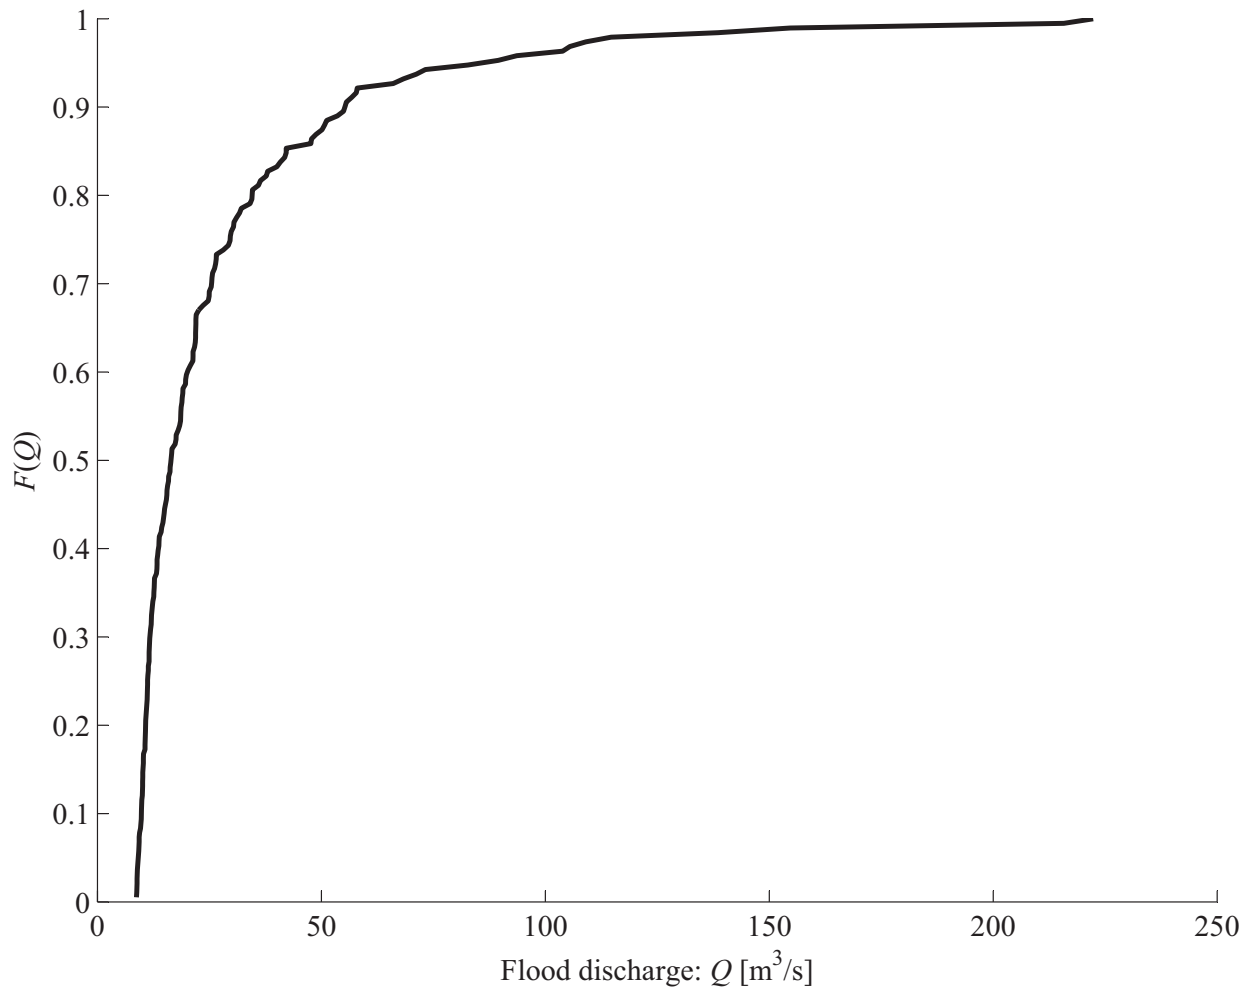

Cumulative distribution function (CDF) used  
for the evaluation of flood inflows:  
Gumbel distribution for the annual maximum discharges

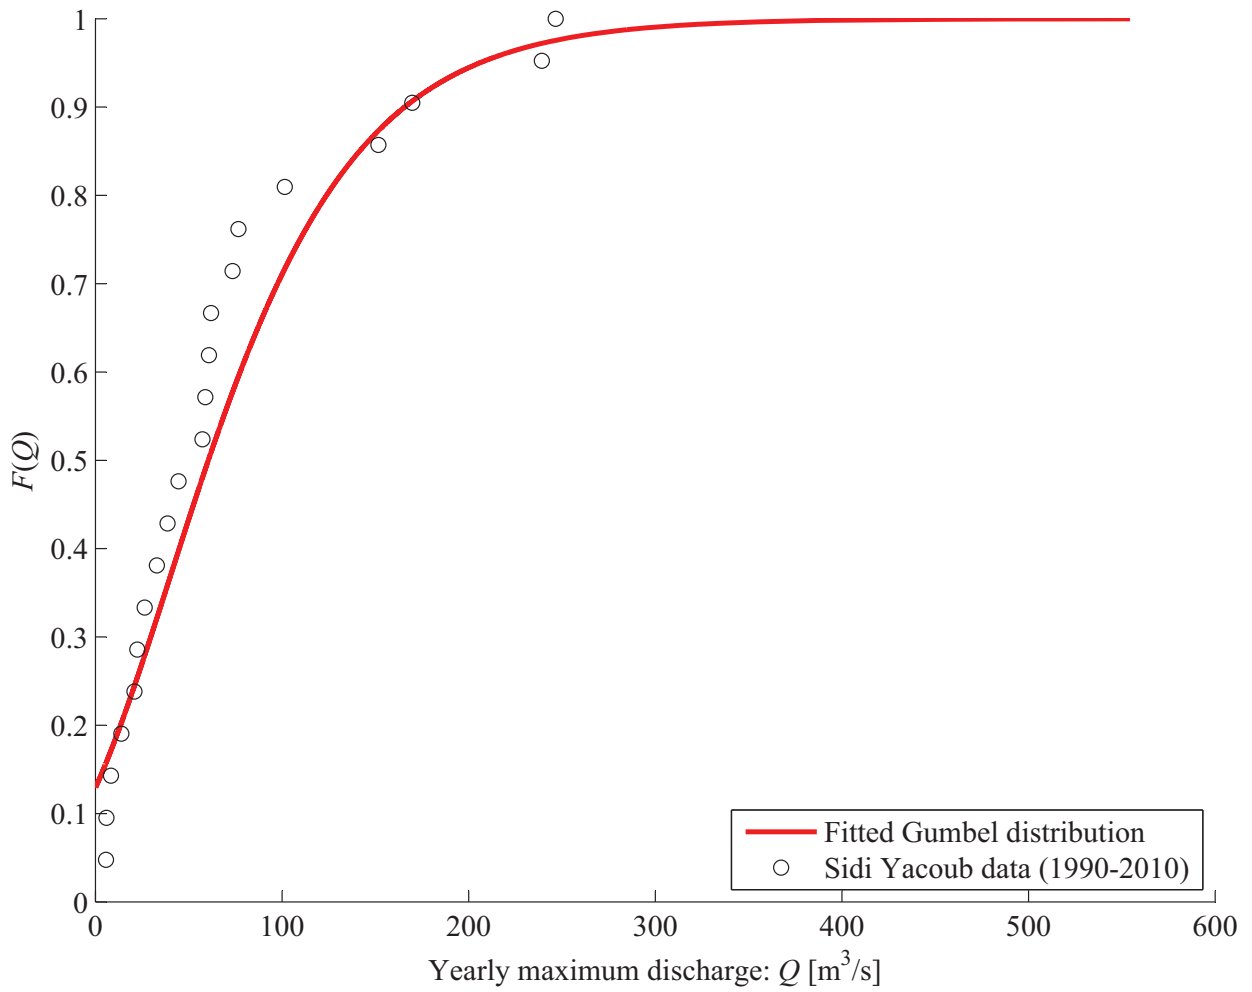

## Verification of the forecasted water inflows: flood flows and zero flows

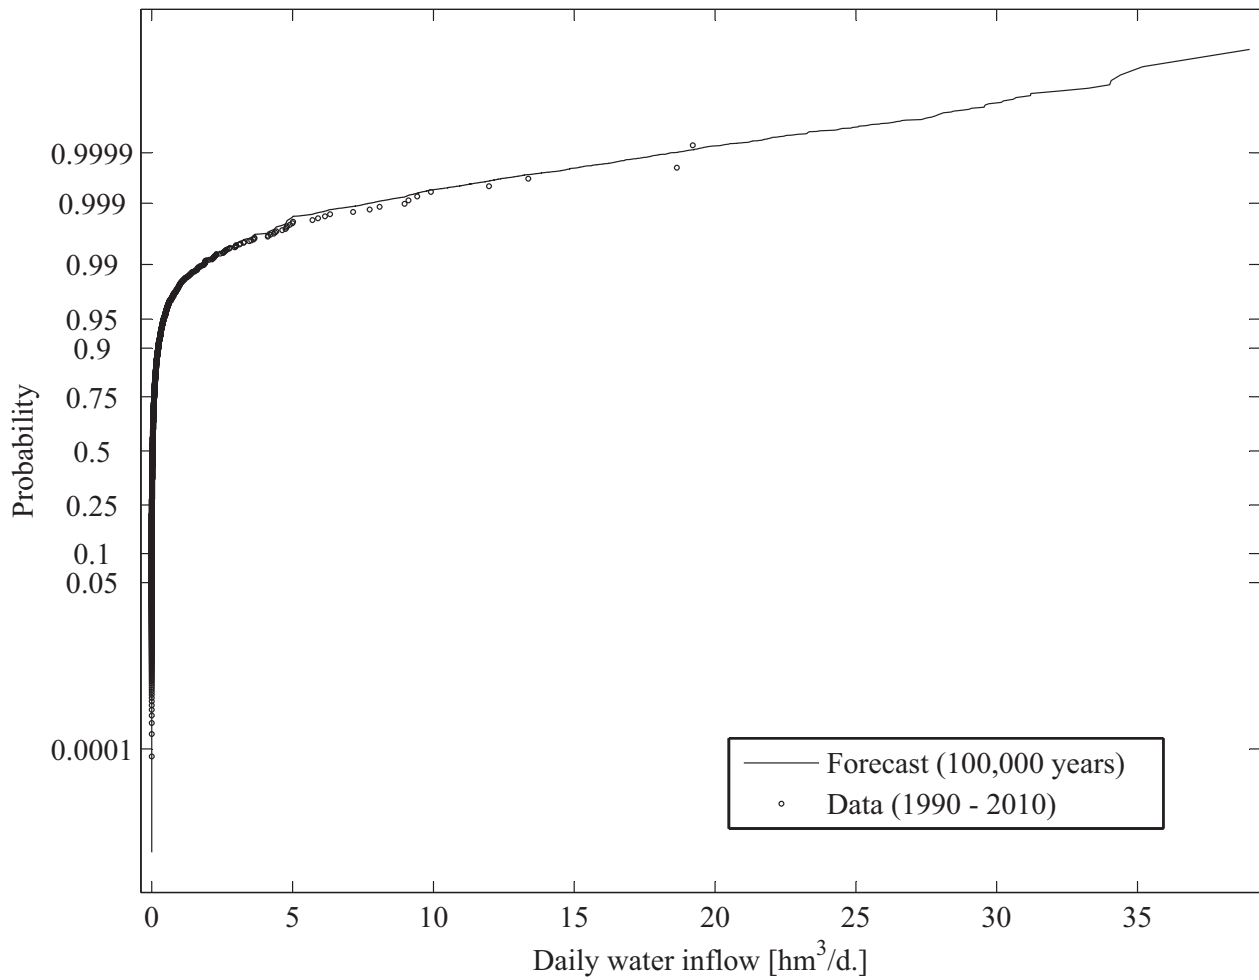



Verification of the forecasted water inflows:  
“normal” flows

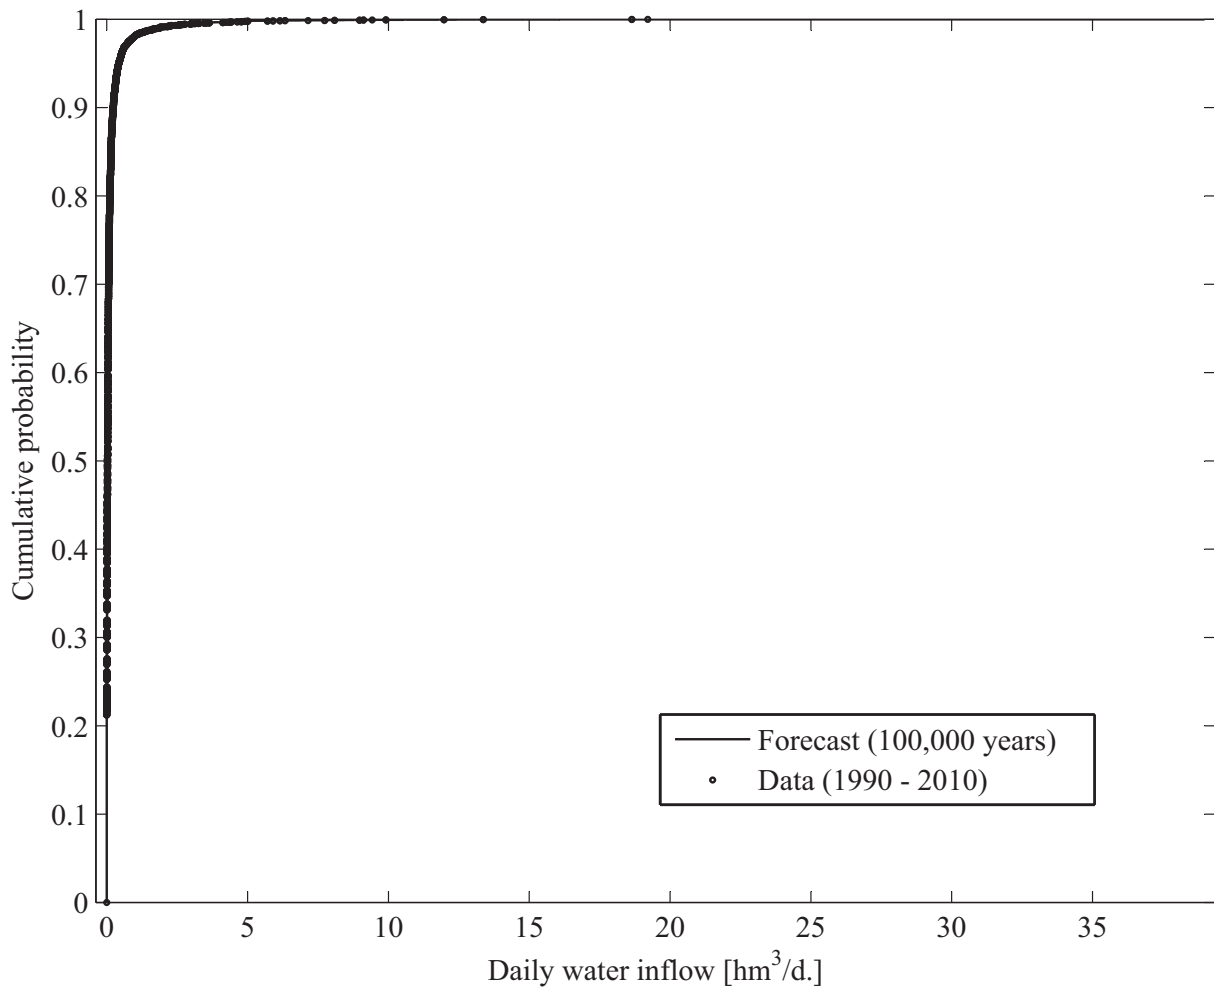

# Verification of the forecasted water inflows

**Table 3: Comparison between data and forecasted inflows.**

| <b>Statistical characteristics</b>          | <b>Data</b> | <b>100,000 year forecast</b> | <b>Difference (to average date)</b> |
|---------------------------------------------|-------------|------------------------------|-------------------------------------|
| Average Inflow [hm <sup>3</sup> /d]         | 0.1268      | 0.1280                       | +1 %                                |
| Standard deviation [hm <sup>3</sup> /d]     | 0.5789      | 0.5527                       | - 3 %                               |
| Mean wet season inflow [hm <sup>3</sup> /d] | 0.1711      | 0.1658                       | - 3 %                               |
| Mean dry season inflow [hm <sup>3</sup> /d] | 0.0237      | 0.0407                       | +66 %                               |
