# Supplementary figures and images for: Stochastic Modelling of Reservoir Sedimentation in a Semi-Arid Watershed
Source: Springer Nature journal article supplement (doi:10.1007/s11269-014-0843-4), 2014-11-09

Measured flow and sediment discharges during eight floods at the gauging station “01 23 11”.

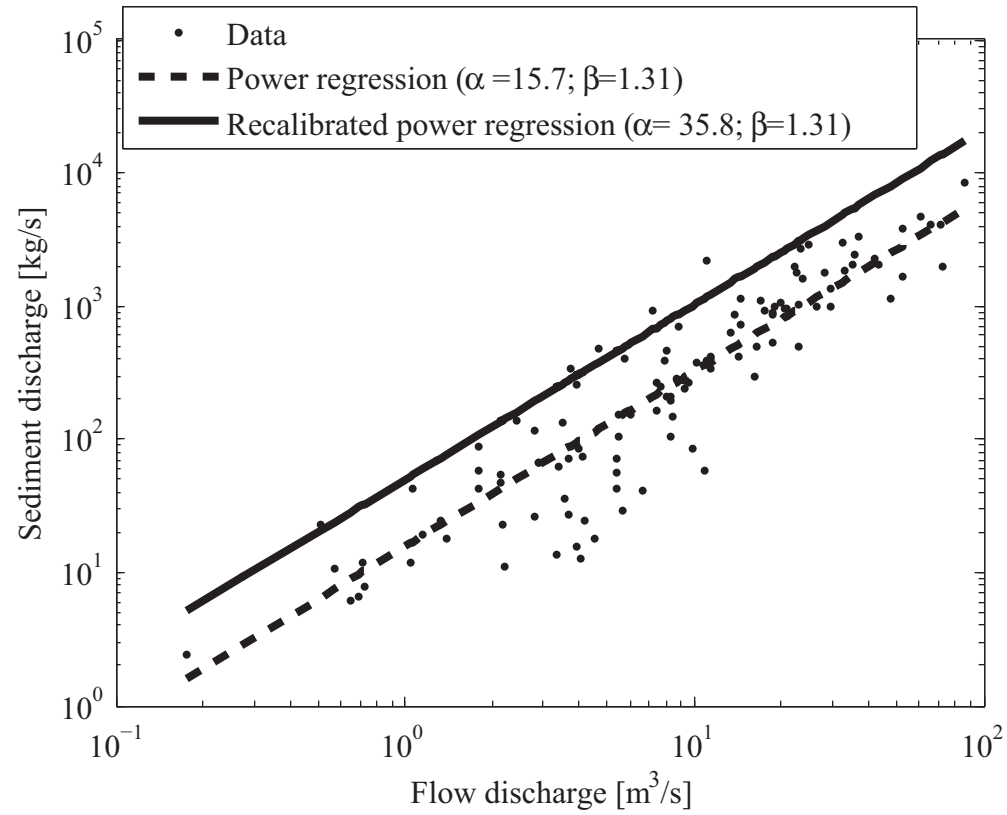

Supplement: MOESM2 [file 11269_2014_843_MOESM2_ESM.pdf]
